# Supplementary material for: Bioactive Potential of Olive Mill Waste Obtained from Cultivars Grown in the Island of Malta
Source: MDPI journal article supplement (doi:10.3390/foods13081152), 2024-04-10
Supplement: s1 [file s1]

## Supplementary material

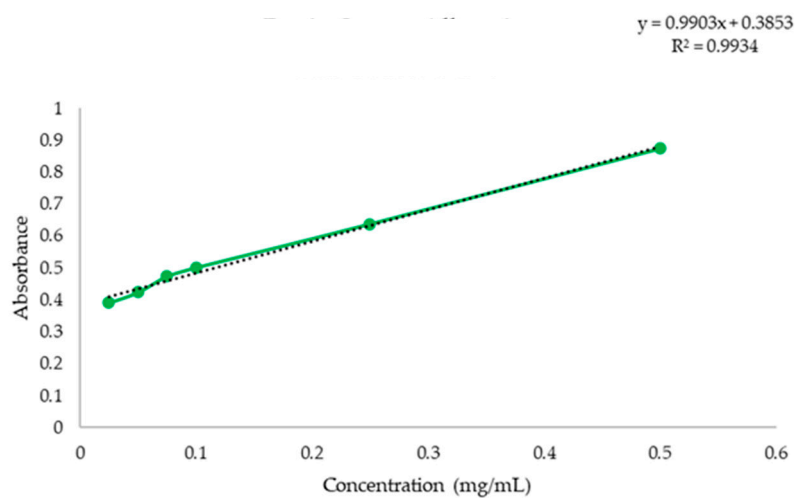

**Figure S1: Calibration curve for bovine serum albumin for protein content.**

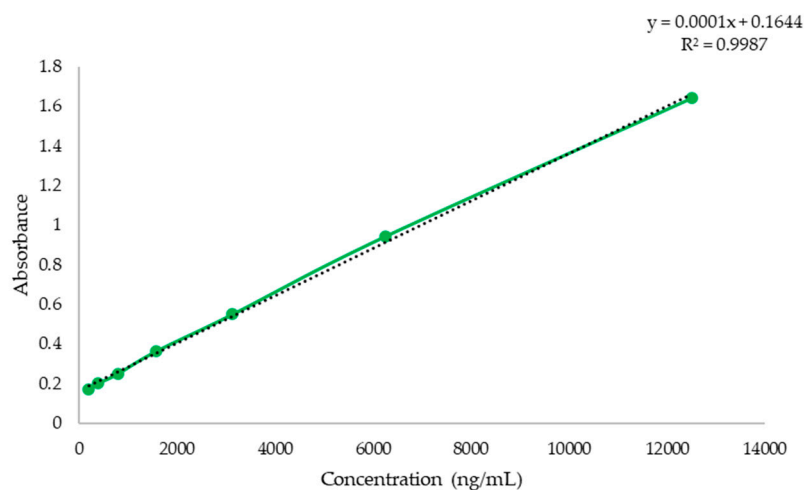

**Figure S2: Calibration curve for BCL-2.**

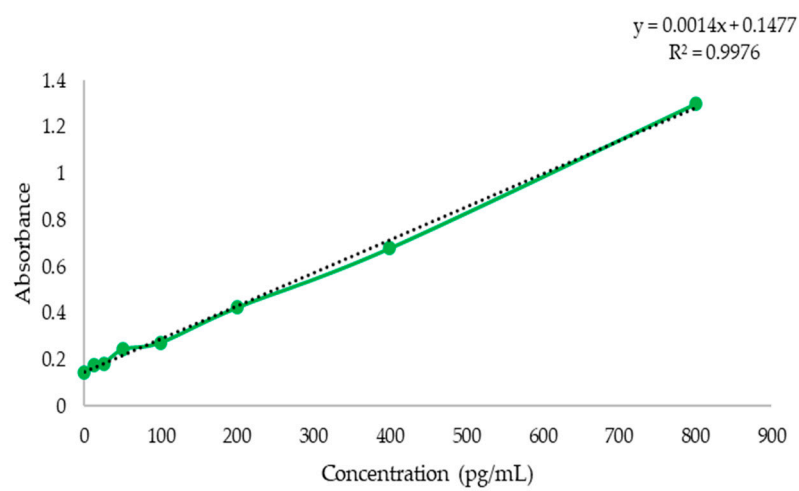

**Figure S3: Calibration curve for BAX.**

**Table S1: Standards used for the identification of phenolic compounds in olive mill waste extracts.**

| Compound                          | RRT  | Standards            |                |             |           |           |            |
|-----------------------------------|------|----------------------|----------------|-------------|-----------|-----------|------------|
|                                   |      | Regression Equation  | R <sup>2</sup> | Range µg/ml | LOD µg/ml | LOQ µg/ml | % Recovery |
| 5,7- dihydroxy flavone            | 3.78 | y = 6343x + 71.913   | 0.9969         | 0.5-20      | 0.35      | 0.80      | 95.33      |
| Quercetin                         | 3.05 | y = 68130x - 133639  | 0.9983         | 0.5-20      | 0.39      | 1.19      | 94.31      |
| 3',4,5,7-tetreahydroxy flavone    | 2.96 | y = 82255x - 289662  | 0.9985         | 0.5-20      | 0.42      | 1.27      | 86.73      |
| Ligstorside                       | 2.92 | y = 17918x - 2974.1  | 0.9996         | 0.5-20      | 0.31      | 0.93      | 86.43      |
| Oleocanthal                       | 2.94 | y = 2384.5x - 845.48 | 0.9980         | 0.5-20      | 0.10      | 0.71      | 85.44      |
| Oleuoside                         | 2.85 | y = 4579x - 3169.1   | 0.9973         | 0.5-20      | 0.15      | 0.45      | 92.87      |
| Oleuropein                        | 2.69 | y = 14833x - 5282.3  | 0.9993         | 0.5-20      | 0.14      | 0.35      | 96.88      |
| Oleacein                          | 2.54 | y = 2641.1x - 700.45 | 0.9997         | 0.5-20      | 1.56      | 2.16      | 93.30      |
| Salicylic acid                    | 2.44 | y = 12405x + 9607    | 1.000          | 0.5-20      | 0.21      | 1.07      | 85.18      |
| Apigenin 7-glucoside              | 2.41 | y = 26819x - 23144   | 0.9977         | 0.5-20      | 0.52      | 1.69      | 94.92      |
| Luteolin 7-glucoside              | 2.34 | y = 20573x - 7756.4  | 0.9989         | 0.5-20      | 0.52      | 1.57      | 90.33      |
| Ellagic acid                      | 2.22 | y = 105392x - 18766  | 0.9998         | 0.5-20      | 0.17      | 0.52      | 90.50      |
| 2-hydroxy-cinnamic acid (trans)   | 2.19 | y = 142725x - 13588  | 0.9996         | 0.5-20      | 0.19      | 0.71      | 93.13      |
| Ferulic acid                      | 1.91 | y = 29993x - 6501.2  | 0.9997         | 0.5-20      | 0.28      | 0.86      | 86.75      |
| 3-methoxy-4-hydroxy cinnamic acid | 1.78 | y = 65581x - 16482   | 0.9999         | 0.5-20      | 0.17      | 0.51      | 89.78      |
| p-coumaric acid                   | 1.44 | y = 85755x - 34844   | 0.9996         | 0.5-50      | 0.32      | 0.98      | 89.94      |
| Vanillin                          | 1.22 | y = 117082x - 469630 | 0.9973         | 0.5-20      | 0.10      | 0.30      | 89.45      |
| 2,4 dihydroxy benzoic acid        | 0.82 | y = 28900x - 20637   | 0.9988         | 0.5-20      | 0.48      | 1.15      | 96.75      |
| Vanillic acid                     | 0.78 | y = 49621x - 52631   | 0.9931         | 0.5-20      | 0.45      | 1.12      | 88.49      |
| Catechin                          | 0.66 | y = 5883.3x - 15172  | 0.9944         | 0.5-20      | 0.88      | 2.65      | 90.57      |
| 4-hydroxy-benzoic acid            | 0.54 | y = 40721x + 91209   | 0.9994         | 0.5-20      | 0.40      | 1.23      | 98.88      |
| 2-(4- hydroxy phenyl) ethanol     | 0.51 | y = 28088x + 75468   | 1.000          | 0.5-100     | 0.37      | 1.13      | 99.99      |
| 3 Hydroxytyrosol                  | 0.31 | y = 20898x - 4825.5  | 0.9996         | 0.5-200     | 0.26      | 0.78      | 90.16      |
| Gallic Acid                       | 0.26 | y = 30973x - 13376   | 0.9976         | 0.5-20      | 0.12      | 0.45      | 98.46      |

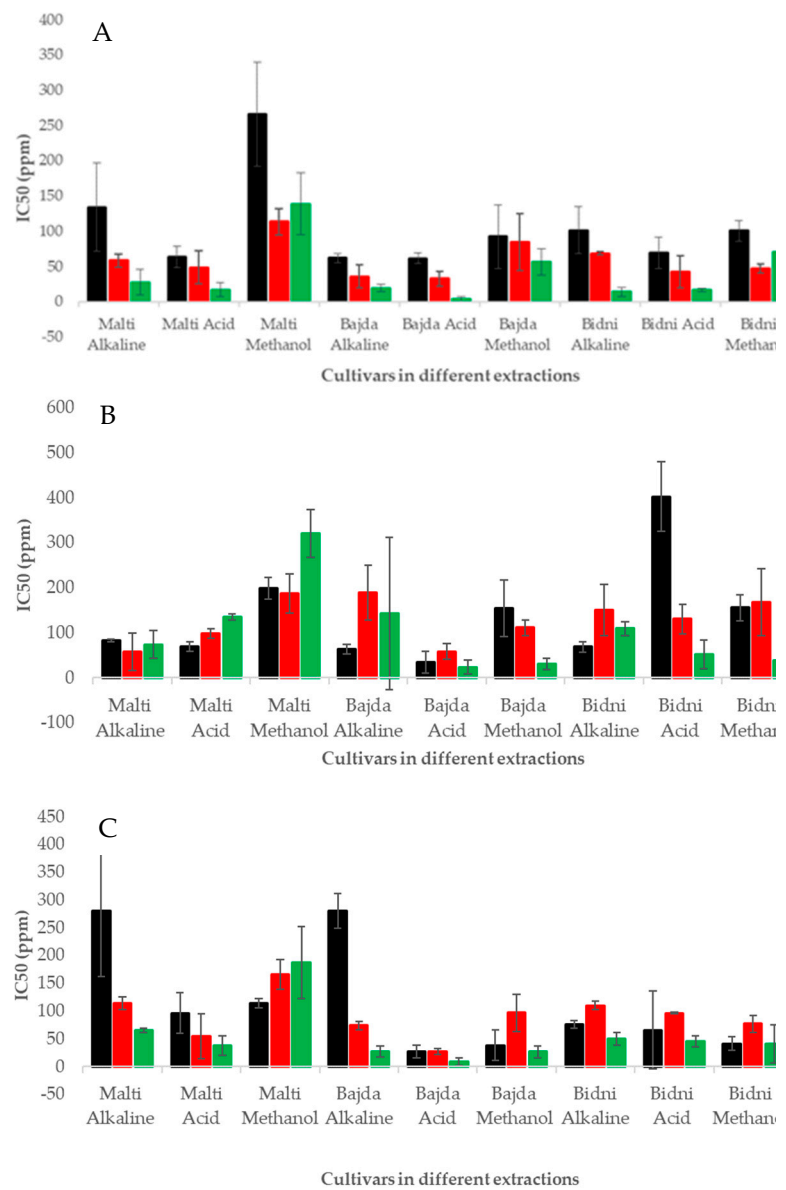

**Figure S4: IC<sub>50</sub>'s of (A) NB4r2, (B) HL-60 and (C) KG-1a cell lines treated with olive mill waste extracts at 24 (black), 48 (red) and 72 (green) h of exposure.**

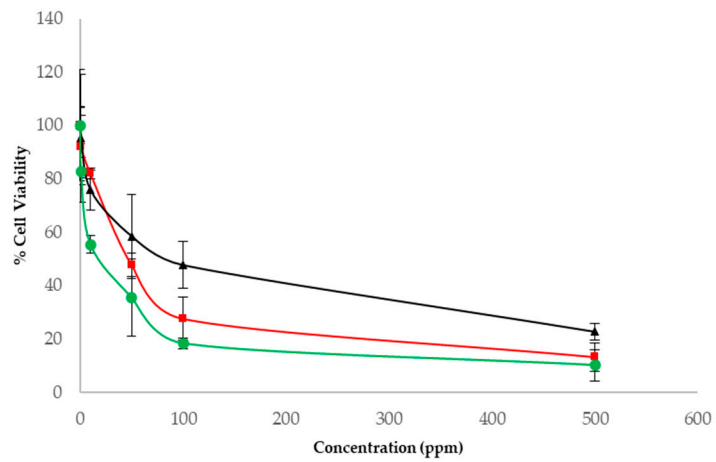

Figure S5: The percentage cell viability against concentration graph of 'Bajda' cultivar acid (red), methanol (black) and alkaline (green) extraction on NB4r2 cell line at 48 hours of exposure.

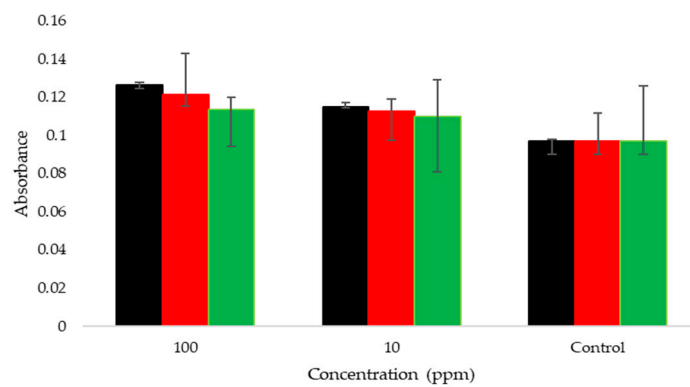

Figure S6: Caspase-3 activity on KG-1a cell lines after 24 h of exposure using different concentrations (100 and 10 ppm) for 'Bidni' (black), 'Bajda' (red) and 'Malti' (green) extracts with the addition of a control.

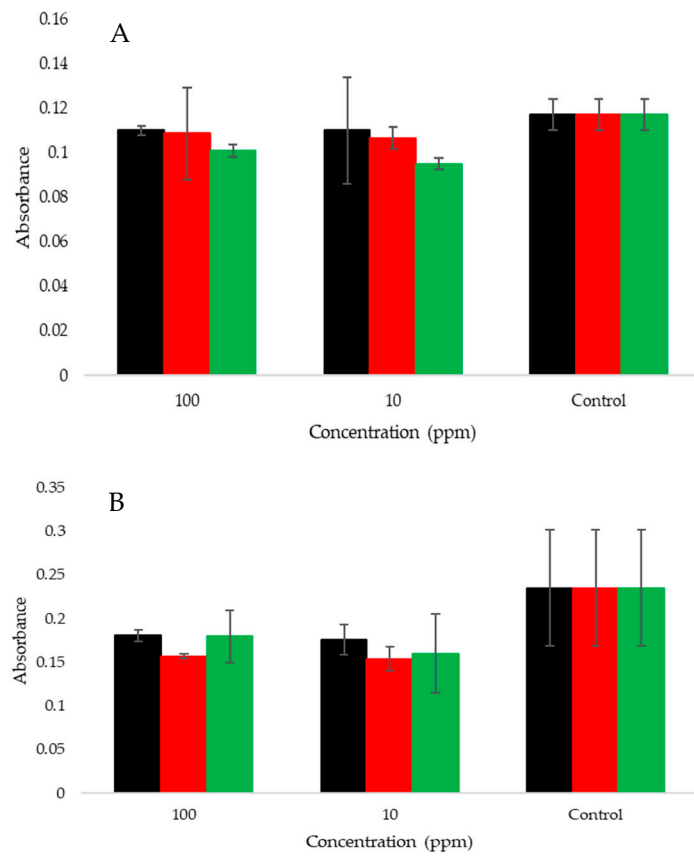

**Figure S7: BCL-2 content on KG-1a cell lines after 24 hours (A) and 48 hours (B) of exposure using different concentrations for 'Bidni' (black), 'Bajda' (red) and 'Malti' (green) extracts with the addition of a control.**

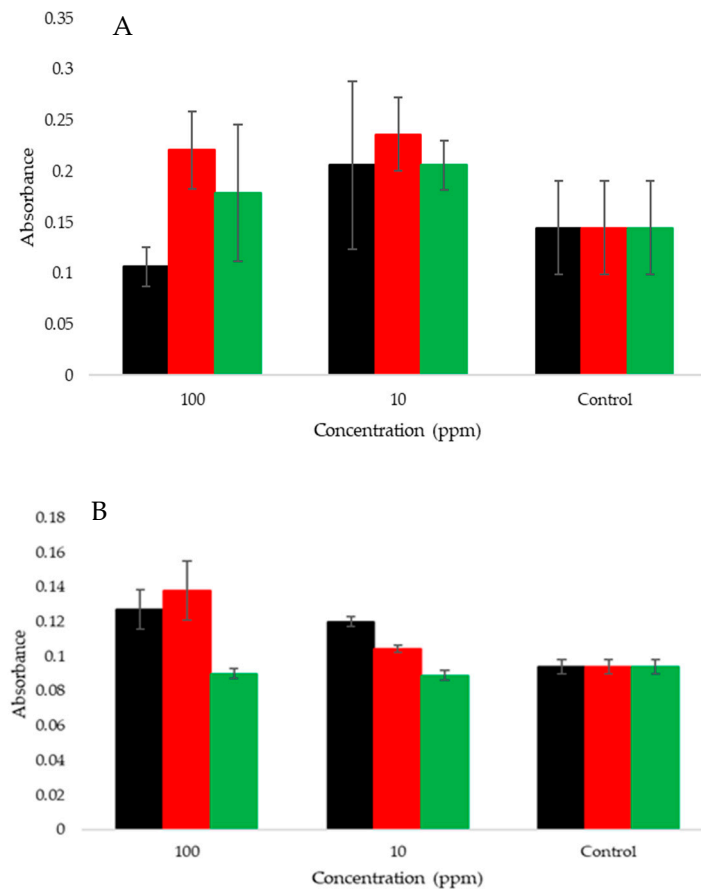

**Figure S8: BAX content on KG-1a cell lines after 24 hours (A) and 48 hours (B) of exposure using different concentrations for 'Bidni' (black), 'Bajda' (red) and 'Malti' (green) extracts with the addition of a control.**

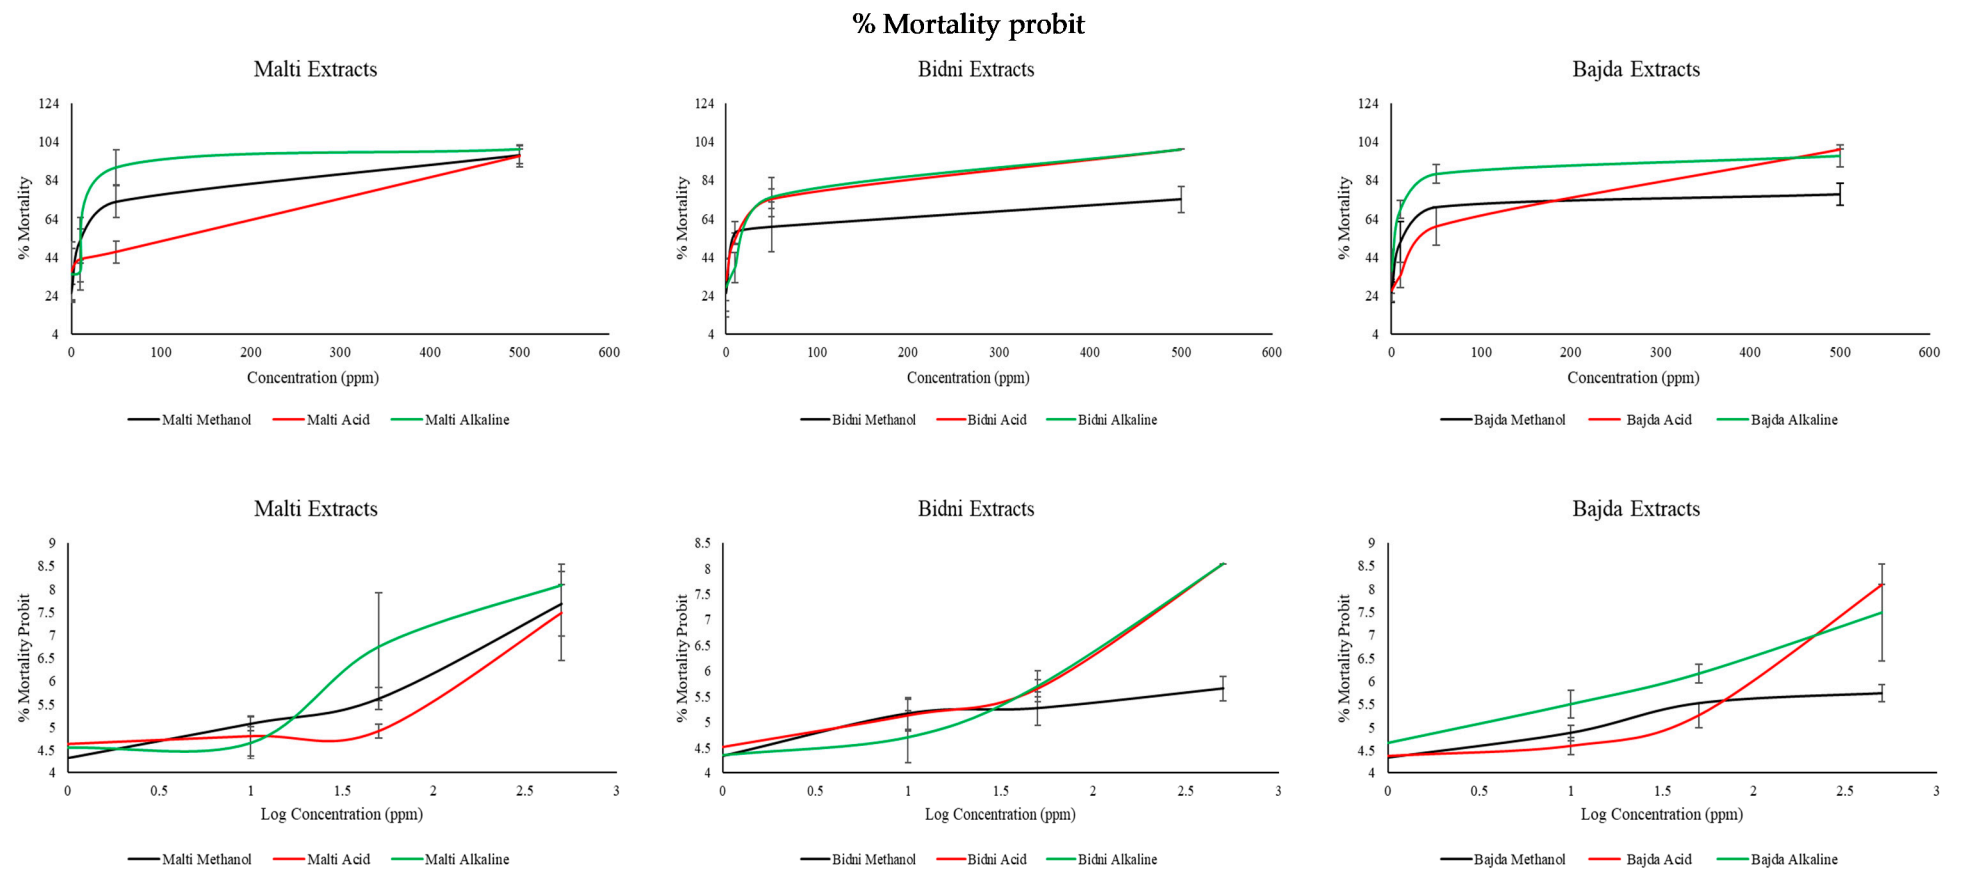

Figure S9: The percentage mortality probit of olive mill waste extracts at different extraction procedures.
